# Supplementary material for: Palmitate drives mitochondrial and ER stress through disruption of the CD73-Adenosine axis
Source: Research Square preprint supplement (doi:10.21203/rs.3.rs-9902042/v1), 2026-06-15
Supplement: Supplementary file 1 [file 5312aca3195abda28fed8e83.pdf]

## Supplementary Information

### Palmitate drives mitochondrial and ER stress through disruption of the CD73-Adenosine axis

Shantiece Dawson<sup>1,#</sup>, Sonia Batan<sup>1,#</sup>, Nina Adams<sup>1</sup>, Sergei Bombin<sup>2</sup>, Erivan S. Ramos-Junior<sup>1,\*</sup>, Ana Carolina Morandini<sup>1,3 \*</sup>

1. Department of Oral Biology, Dental College of Georgia at Augusta University, Augusta, GA, USA
2. Georgia Cancer Center & Department of Pathology, Medical College of Georgia, Augusta University, Augusta, GA, USA
3. Department of Periodontics, Dental College of Georgia at Augusta University, Augusta, GA, USA

# These authors contributed equally and share first authorship in the manuscript.

#### **\*Corresponding authors:**

Ana C. Morandini

Dental College of Georgia

[amorandini@augusta.edu](mailto:amorandini@augusta.edu)

ORCID: 0000-0003-4749-571X

Erivan S. Ramos-Junior

Dental College of Georgia

[eramosjunior@augusta.edu](mailto:eramosjunior@augusta.edu)

ORCID: 0000-0003-0228-4257

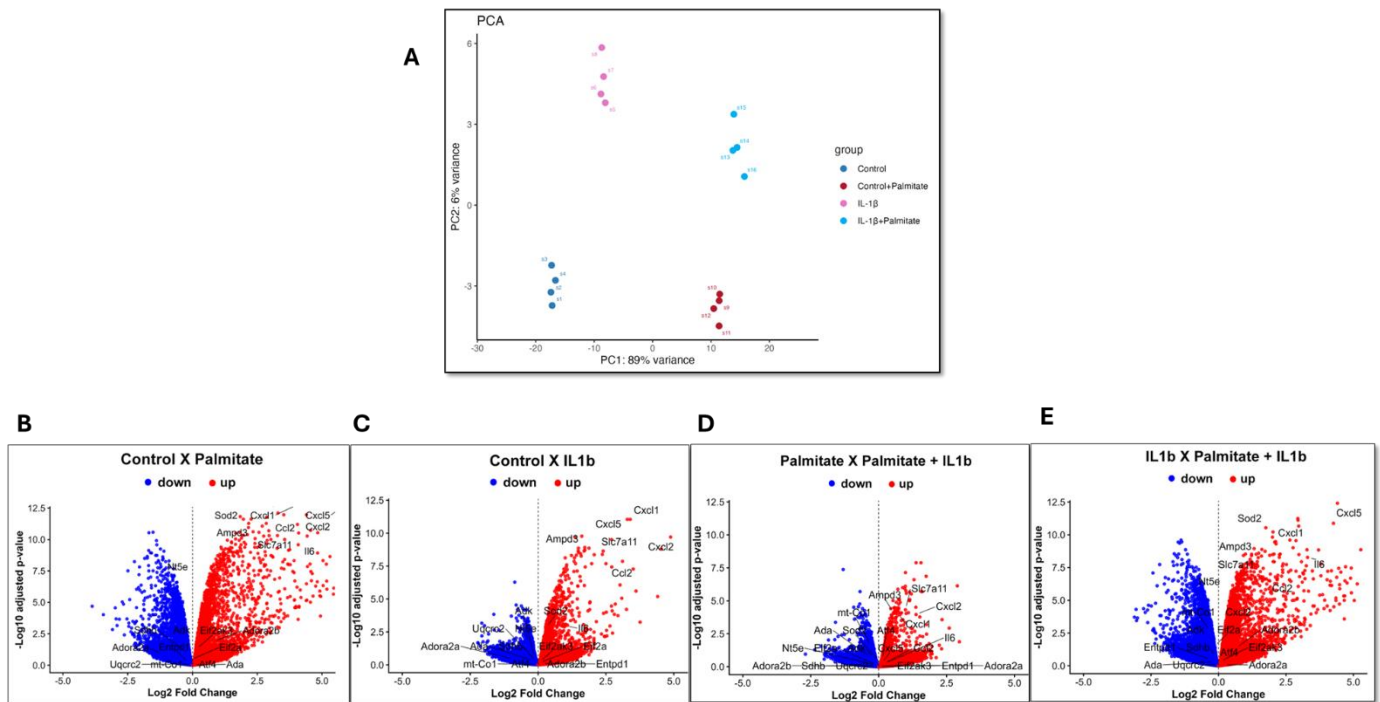

**Supplementary Figure 1. Global transcriptional changes induced by palmitate and IL-1 $\beta$  in mouse gingival fibroblasts.** (A) Principal component analysis (PCA) showing separation of samples based on treatment conditions. (B) Volcano plot highlighting differentially expressed genes with significantly upregulated genes shown in red and downregulated genes in blue (adjusted  $p < 0.05$ )

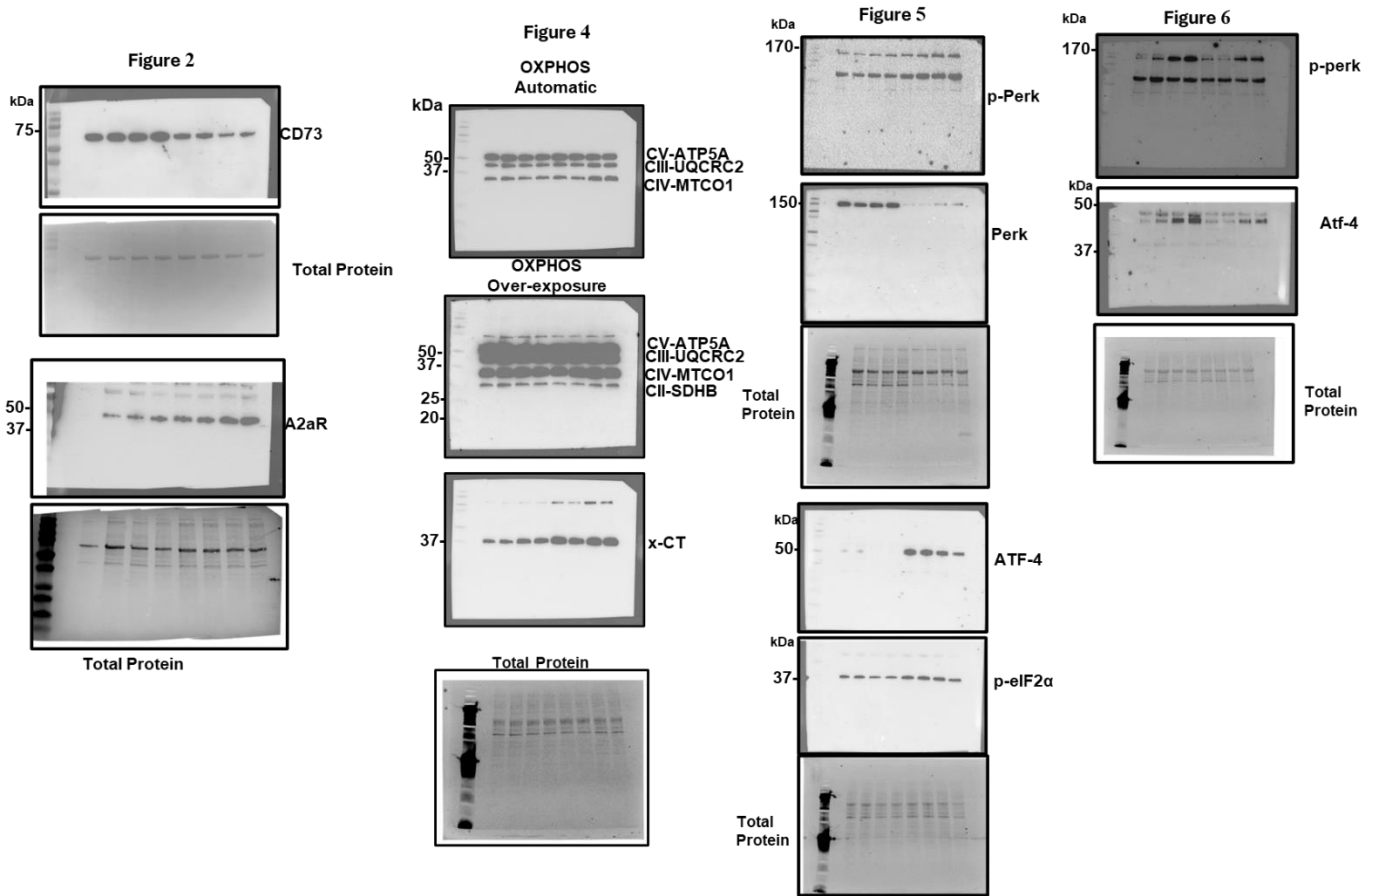

Supplementary Figure 2. Images of Uncropped immunoblots.
